**Appendix S1.** Included taxa with museum information

| Type of group | Species                                               | Catalogue number                                                               | Family                                                      |
|---------------|-------------------------------------------------------|--------------------------------------------------------------------------------|-------------------------------------------------------------|
| In            | <i>Belzebub chacei</i> Bowman & McCain, 1967          | ZMUC CRU-4440                                                                  | Luciferidae De Haan, 1849<br>(in De Haan, 1833–1850)        |
| In            | <i>Belzebub faxoni</i> Borradaile, 1915               | ZMUC CRU-4448,<br>ZMUC CRU-4450                                                |                                                             |
| In            | <i>Belzebub hanseni</i> Nobili, 1905                  | ZMUC CRU-4428                                                                  |                                                             |
| In            | <i>Belzebub intermedius</i> Hansen, 1919              | ZMUC CRU-4422                                                                  |                                                             |
| In            | <i>Belzebub penicillifer</i> Hansen, 1919             | ZMUC CRU-4431                                                                  |                                                             |
| In            | <i>Lucifer orientalis</i> Hansen, 1919                | ZMUC CRU-4437                                                                  |                                                             |
| In            | <i>Lucifer typus</i> H. Milne Edwards, 1837           | ZMUC CRU-4447                                                                  |                                                             |
| Out           | <i>Aristaeomorpha foliacea</i> (Risso, 1827)          | ZMUC CRU-4451                                                                  | Aristeidae Wood-Mason<br>(in Wood-Mason & Alcock, 1891)     |
| Out           | <i>Gennadas parvus</i> Bate, 1881                     |                                                                                | Benthescymidae Wood-Mason (in<br>Wood-Mason & Alcock, 1891) |
| Out           | <i>Penaeus monodon</i> Fabricius, 1798                |                                                                                | Penaeidae Rafinesque, 1815;                                 |
| In            | <i>Acetes indicus</i> H. Milne Edwards, 1830          | ZMUC CRU-4441                                                                  | Sergestidae Dana, 1852;                                     |
| In            | <i>Allosergestes sargassi</i> (Ortmann, 1893)         | ZMUC CRU-4548                                                                  |                                                             |
| In            | <i>Challengerosergia challengerii</i> (Hansen, 1903)  | NHM 1903.6.6.14                                                                |                                                             |
| In            | <i>Cornutosergestes cornutus</i> (Krøyer, 1855)       | ZMUC CRU-4533<br>(syntypes)                                                    |                                                             |
| In            | <i>Deosergestes corniculum</i> (Krøyer, 1855)         | ZMUC CRU-6077<br>(syntypes)                                                    |                                                             |
| In            | <i>Eusergestes arcticus</i> (Krøyer, 1855)            | ZMUC CRU-5590<br>(holotype, dissected),<br>ZMUC CRU-4528                       |                                                             |
| In            | <i>Gardinerosergia gardneri</i> (Kemp, 1913)          | ZMUC CRU-3726                                                                  |                                                             |
| In            | <i>Lucensosergia lucens</i> (Hansen, 1922)            | ZMUC CRU-4425                                                                  |                                                             |
| In            | <i>Neosergestes edwardsi</i> (Krøyer, 1855)           | ZMUC CRU-4526                                                                  |                                                             |
| In            | <i>Parasergestes armatus</i> (Krøyer, 1855)           | ZMUC CRU-5626<br>(postlarva), ZMUC<br>CRU-4507                                 |                                                             |
| In            | <i>Peisos petrunkevitchi</i> Burkenroad, 1945         | SMNH Type 2338<br>(holotype)                                                   |                                                             |
| In            | <i>Petalidium foliaceum</i> Bate, 1881                | NHM 1888.22,<br>1888.22, 1903.6.6.16<br>(syntypes, damaged),<br>ZMUC CRU-20546 |                                                             |
| In            | <i>Petalidium obesum</i> (Krøyer, 1859)               | ZMUC CRU-7582<br>(holotype)                                                    |                                                             |
| In            | <i>Petalidium suspiriosum</i> Burkenroad, 1937        | YPM IZ 039178, 068756                                                          |                                                             |
| In            | <i>Phorcosergia phorca</i> (Faxon, 1893)              | ZMUC CRU-4434                                                                  |                                                             |
| In            | <i>Prehensilosergia prehensilis</i> (Bate, 1881)      | NHM 1888.2                                                                     |                                                             |
| In            | <i>Robustosergia robusta</i> (Smith, 1882)            | USNM 7316                                                                      |                                                             |
| In            | <i>Scintillosergia scintillans</i> (Burkenroad, 1940) | ZMUC CRU-3613                                                                  |                                                             |
| In            | <i>Sergestes atlanticus</i> Milne-Edwards, 1830       | MNHN, NA 331<br>(syntypes, bad<br>condition), ZMUC<br>CRU-4542                 |                                                             |
| In            | <i>Sergia tenuiremis</i> (Krøyer, 1855)               | ZMUC CRU-8362                                                                  |                                                             |
| In            | <i>Sicyonella maldivensis</i> Borradaile, 1910        | ZMUC CRU-4443                                                                  |                                                             |

MNHN, Museum National d'Histoire Naturelle, Paris; NHM, British Museum (Natural History); SMNH, Naturhistoriska Riksmuseet, Sweden; USNM, United States National Museum; YPM, Yale Peabody Museum; ZMUC, Zoological Museum, University of Copenhagen.

**Appendix S2.** List of characters used. New or revised characters are marked with asterisks (\*)

| Character no.   | Character state                                                | State no. | Reference to figure and source                 |
|-----------------|----------------------------------------------------------------|-----------|------------------------------------------------|
| <b>Carapace</b> |                                                                |           |                                                |
| 0               | Integument firm                                                | 0         |                                                |
|                 | Integument membranous                                          | 1         |                                                |
| 1               | Labrum not much separated from antennae and eyes               | 0         |                                                |
|                 | Labrum widely separated from antennae and eyes                 | 1         |                                                |
| 2               | Rostrum bears 2 or more dorsal teeth behind the orbital margin | 0         |                                                |
|                 | Rostrum bears 0–1 dorsal teeth behind the orbital margin       | 1         |                                                |
| 3               | Frontal margin of rostrum oblique                              | 0         | fig. 2B, D in Vereshchaka <i>et al.</i> (2014) |
|                 | Frontal margin of rostrum vertical                             | 1         | fig. 2A in Vereshchaka <i>et al.</i> (2014)    |
| 4               | Supraorbital tooth absent                                      | 0         | fig. 2A–C in Vereshchaka <i>et al.</i> (2014)  |
|                 | Supraorbital tooth present                                     | 1         | fig. 2D in Vereshchaka <i>et al.</i> (2014)    |
| 5               | Pterygostomial tooth absent                                    | 0         |                                                |
|                 | Pterygostomial tooth present                                   | 1         |                                                |
| 6               | Hepatic protrusion prominent                                   | 0         |                                                |
|                 | Hepatic protrusion inconspicuous                               | 1         |                                                |
| 7               | Hepatic protrusion forming a barb                              | 0         | fig. 2A–C in Vereshchaka <i>et al.</i> (2014)  |
|                 | Hepatic protrusion forming a spine                             | 1         | fig. 2D in Vereshchaka <i>et al.</i> (2014)    |
| <b>Branchia</b> |                                                                |           |                                                |
| 8               | Somite VIII, arthrobranch developed                            | 0         |                                                |
|                 | Somite VIII, arthrobranch rudimentary or absent                | 1         |                                                |
| 9               | Somite VIII, arthrobranch absent                               | 0         |                                                |
|                 | Somite VIII, arthrobranch present                              | 1         |                                                |
| 10              | Somite IX, anterior arthrobranch present                       | 0         |                                                |
|                 | Somite IX, anterior arthrobranch absent                        | 1         |                                                |
| 11              | Somite IX, posterior arthrobranch present                      | 0         |                                                |
|                 | Somite IX, posterior arthrobranch absent                       | 1         |                                                |
| 12              | Somite IX, posterior arthrobranch developed                    | 0         |                                                |
|                 | Somite IX, posterior arthrobranch reduced                      | 1         |                                                |
| 13              | Somite IX, posterior arthrobranch dendritic                    | 0         |                                                |
|                 | Somite IX, posterior arthrobranch lamellar                     | 1         |                                                |
| 14              | Somite X, anterior arthrobranch present                        | 0         |                                                |
|                 | Somite X, anterior arthrobranch absent                         | 1         |                                                |
| 15              | Somite X, posterior arthrobranch present                       | 0         |                                                |
|                 | Somite X, posterior arthrobranch absent                        | 1         |                                                |
| 16              | Somite X, posterior arthrobranch developed                     | 0         |                                                |
|                 | Somite X, posterior arthrobranch reduced                       | 1         |                                                |
| 17              | Somite X, posterior arthrobranch dendritic                     | 0         |                                                |
|                 | Somite X, posterior arthrobranch lamellar                      | 1         |                                                |
| 18              | Somite XI, anterior arthrobranch present                       | 0         |                                                |
|                 | Somite XI, anterior arthrobranch absent                        | 1         |                                                |
| 19              | Somite XI, posterior arthrobranch present                      | 0         |                                                |
|                 | Somite XI, posterior arthrobranch absent                       | 1         |                                                |
| 20              | Somite XI, posterior arthrobranch developed                    | 0         |                                                |
|                 | Somite XI, posterior arthrobranch reduced                      | 1         |                                                |
| 21              | Somite XI, posterior arthrobranch dendritic                    | 0         |                                                |
|                 | Somite XI, posterior arthrobranch lamellar                     | 1         |                                                |
| 22              | Somite XII, anterior arthrobranch present                      | 0         |                                                |
|                 | Somite XII, anterior arthrobranch absent                       | 1         |                                                |
| 23              | Somite XII, posterior arthrobranch developed                   | 0         |                                                |
|                 | Somite XII, posterior arthrobranch reduced                     | 1         |                                                |

Appendix S2. Continued

| Character no.      | Character state                                                                             | State no. | Reference to figure and source              |
|--------------------|---------------------------------------------------------------------------------------------|-----------|---------------------------------------------|
| 24                 | Somite XII, posterior arthrobranch present                                                  | 0         |                                             |
|                    | Somite XII, posterior arthrobranch absent                                                   | 1         |                                             |
| 25                 | Somite XII, posterior arthrobranch developed                                                | 0         |                                             |
|                    | Somite XII, posterior arthrobranch reduced                                                  | 1         |                                             |
| 26                 | Somite XII, posterior arthrobranch dendritic                                                | 0         |                                             |
|                    | Somite XII, posterior arthrobranch lamellar                                                 | 1         |                                             |
| 27                 | Somite XIII, anterior arthrobranch present                                                  | 0         |                                             |
|                    | Somite XIII, anterior arthrobranch absent                                                   | 1         |                                             |
| 28                 | Somite XIII, posterior arthrobranch present                                                 | 0         |                                             |
|                    | Somite XIII, posterior arthrobranch absent                                                  | 1         |                                             |
| 29                 | Somite XIII, posterior arthrobranch developed                                               | 0         |                                             |
|                    | Somite XIII, posterior arthrobranch reduced                                                 | 1         |                                             |
| 30                 | Somite XIII, posterior arthrobranch dendritic                                               | 0         |                                             |
|                    | Somite XIII, posterior arthrobranch lamellar                                                | 1         |                                             |
| Abdomen and telson |                                                                                             |           |                                             |
| 31                 | Abdominal somite VI in male without ventral processes                                       | 0         |                                             |
|                    | Abdominal somite VI in male with two ventral processes                                      | 1         |                                             |
| 32                 | Abdominal somite VI in male, posterior ventral process not tapering, obtuse at the end      | 0         |                                             |
|                    | Abdominal somite VI in male, posterior ventral process tapering, nearly acute at the end    | 1         |                                             |
| 33                 | Abdominal somite VI in male, posterior ventral process curved                               | 0         |                                             |
|                    | Abdominal somite VI in male, posterior ventral process straight                             | 1         |                                             |
| 34                 | Telson, movable lateral spines present                                                      | 0         |                                             |
|                    | Telson, movable lateral spines absent                                                       | 1         |                                             |
| 35                 | Telson, four movable lateral spines                                                         | 0         |                                             |
|                    | Telson, two movable lateral spines                                                          | 1         |                                             |
| 36                 | Telson in male without distoventral protuberance                                            | 0         |                                             |
|                    | Telson in male with conspicuous distoventral protuberance                                   | 1         |                                             |
| Eye                |                                                                                             |           |                                             |
| 37                 | Eyes not sexually dimorphic                                                                 | 0         |                                             |
|                    | Eyes sexually dimorphic                                                                     | 1         |                                             |
| 38                 | Eyestalks not elongated, nearly reaching end of scaphocerite                                | 0         |                                             |
|                    | Eyestalks elongated, not reaching end of scaphocerite                                       | 1         |                                             |
| Antennule          |                                                                                             |           |                                             |
| 39                 | Antennule, first segment much longer (by half or more) than third segment                   | 0         | fig. 2E in Vereshchaka <i>et al.</i> (2014) |
|                    | Antennule, first segment subequal or slightly longer (by less than half) than third segment | 1         |                                             |
|                    | Antennule, first segment shorter than third segment                                         | 2         | fig. 2F in Vereshchaka <i>et al.</i> (2014) |
| 40                 | Third segment without distoventral processus in male                                        | 0         |                                             |
|                    | Third segment with distoventral processus in male                                           | 1         | fig. 2G in Vereshchaka <i>et al.</i> (2014) |
| 41                 | Third segment, distoventral processus in male short                                         | 0         |                                             |
|                    | Third segment, distoventral processus in male long                                          | 1         |                                             |
| 42                 | Antennules in male with ventral flagellum                                                   | 0         |                                             |
|                    | Antennules in male without ventral flagellum                                                | 1         |                                             |

Appendix S2. *Continued*

| Character no.     | Character state                                               | State no. | Reference to figure and source              |
|-------------------|---------------------------------------------------------------|-----------|---------------------------------------------|
| 43                | Stylocerite absent                                            | 0         |                                             |
|                   | Stylocerite present                                           | 1         |                                             |
| 44                | Stylocerite mobile                                            | 0         |                                             |
|                   | Stylocerite fixed                                             | 1         |                                             |
| Antenna           |                                                               |           |                                             |
| 45                | Distal tooth of scaphocerite not reaching distal end of blade | 0         |                                             |
|                   | Distal tooth of scaphocerite reaching distal end of blade     | 1         | fig. 7G in Vereshchaka <i>et al.</i> (2014) |
|                   | Distal tooth of scaphocerite overreaching distal end of blade | 2         | fig. 7E in Vereshchaka <i>et al.</i> (2014) |
| Mandible          |                                                               |           |                                             |
| 46                | Mandibular palp present                                       | 0         |                                             |
|                   | Mandibular palp absent                                        | 1         |                                             |
| Maxillule         |                                                               |           |                                             |
| 47                | Maxillula in adults with 4 endites                            | 0         |                                             |
|                   | Maxillula in adults with 3 endites                            | 1         |                                             |
|                   | Maxillula in adults with 2 endites                            | 2         |                                             |
|                   | Maxillula in adults with a single endite                      | 3         |                                             |
| First maxilliped  |                                                               |           |                                             |
| 48                | Epipod present                                                | 0         |                                             |
|                   | Epipod absent                                                 | 1         |                                             |
| 49                | Exopod present                                                | 0         |                                             |
|                   | Exopod absent                                                 | 1         |                                             |
| 50                | Endopod with 3–4 segments                                     | 0         |                                             |
|                   | Endopod with 2 segments                                       | 1         |                                             |
|                   | Endopod rudimentary or absent                                 | 2         |                                             |
| Second maxilliped |                                                               |           |                                             |
| 51                | Epipod present                                                | 0         |                                             |
|                   | Epipod absent                                                 | 1         |                                             |
| Third maxilliped  |                                                               |           |                                             |
| 52                | Moderately developed, < 2.0 times as long as first pereopod   | 0         | fig. 2E in Vereshchaka <i>et al.</i> (2014) |
|                   | Enlarged, > 2.0 times as long as first pereopod               | 1         | fig. 2F in Vereshchaka <i>et al.</i> (2014) |
| 53                | Not sexually dimorphic, dactyl not modified                   | 0         | fig. 3D in Vereshchaka <i>et al.</i> (2014) |
|                   | Sexually dimorphic, dactyl modified in males                  | 1         | fig. 3E in Vereshchaka <i>et al.</i> (2014) |
| 54                | Dactyl entire                                                 | 0         |                                             |
|                   | Dactyl subdivided                                             | 1         |                                             |
| 55                | Dactyl subdivided into ordinary subsegments                   | 0         | fig. 2E in Vereshchaka <i>et al.</i> (2014) |
|                   | Dactyl subdivided into specialized subsegments                | 1         | fig. 2F in Vereshchaka <i>et al.</i> (2014) |
| 56                | Dactyl consists of 4 specialized subsegments                  | 0         | fig. 6 in Vereshchaka (2009)                |
|                   | Dactyl consists of 5 specialized subsegments                  | 1         | fig. 6 in Vereshchaka (2009)                |
|                   | Dactyl consists of 6 specialized subsegments                  | 2         | fig. 6 in Vereshchaka (2009)                |
|                   | Dactyl consists of 7 specialized subsegments                  | 3         | fig. 6 in Vereshchaka (2009)                |
| First pereopod    |                                                               |           |                                             |
| 57                | Ischium without strong movable spines                         | 0         |                                             |
|                   | Ischium with strong movable spines                            | 1         | fig. 3F in Vereshchaka <i>et al.</i> (2014) |
| 58*               | Chela absent                                                  | 0         |                                             |
|                   | Chela present                                                 | 1         |                                             |
| 59*               | Chela developed, palm nearly as long as fingers               | 0         |                                             |
|                   | Chela much reduced, palm > 10 times as long as fingers        | 1         |                                             |

Appendix S2. Continued

| Character no.   | Character state                                                              | State no. | Reference to figure and source              |
|-----------------|------------------------------------------------------------------------------|-----------|---------------------------------------------|
| Second pereopod |                                                                              |           |                                             |
| 60              | Ischium without strong distally curved tooth                                 | 0         |                                             |
|                 | Ischium with strong distally curved tooth                                    | 1         | fig. 3G in Vereshchaka <i>et al.</i> (2014) |
| 61              | Merus without distal protrusion                                              | 0         |                                             |
|                 | Merus with distal protrusion                                                 | 1         | fig. 3G in Vereshchaka <i>et al.</i> (2014) |
| 62*             | Chela present                                                                | 0         |                                             |
|                 | Chela absent                                                                 | 1         |                                             |
| 63*             | Chela developed, palm nearly as long as fingers                              | 0         |                                             |
|                 | Chela reduced, palm nearly twice as long as fingers                          | 1         |                                             |
|                 | Chela much reduced, palm > 10 times as long as fingers                       | 2         |                                             |
| 64              | Fixed finger in chela rudimentary, shorter than dactyl                       | 0         | fig. 3H in Vereshchaka <i>et al.</i> (2014) |
|                 | Fixed finger developed, as long as dactyl                                    | 1         | fig. 3I in Vereshchaka <i>et al.</i> (2014) |
| 65              | Chela without very long setae overreaching setae in tufts                    | 0         |                                             |
|                 | Chela with very long setae overreaching setae in tufts                       | 1         | fig. 3I in Vereshchaka <i>et al.</i> (2014) |
| Third pereopod  |                                                                              |           |                                             |
| 66              | Coxa, mesial tooth absent                                                    | 0         |                                             |
|                 | Coxa, mesial tooth present                                                   | 1         |                                             |
| 67              | Basis in female rounded                                                      | 0         |                                             |
|                 | Basis in female with small projection                                        | 1         |                                             |
|                 | Basis in female with tooth                                                   | 2         |                                             |
| 68              | Propodus without specialized strong curved spines proximal to tufts of setae | 0         |                                             |
|                 | Propodus with specialized strong curved spines proximal to tufts of setae    | 1         | fig. 3J in Vereshchaka <i>et al.</i> (2014) |
| 69              | True chela                                                                   | 0         |                                             |
|                 | Subchela                                                                     | 1         | fig. 3I in Vereshchaka <i>et al.</i> (2014) |
| 70              | True chela developed, palm nearly as long as fingers                         | 0         |                                             |
|                 | True chela reduced, palm nearly twice as long as fingers                     | 1         |                                             |
|                 | True chela much reduced, palm > 10 times as long as fingers                  | 2         |                                             |
| 71              | Fixed finger in chela rudimentary, shorter than dactyl                       | 0         | fig. 3J in Vereshchaka <i>et al.</i> (2014) |
|                 | Fixed finger developed, as long as dactyl                                    | 1         | fig. 3K in Vereshchaka <i>et al.</i> (2014) |
| 72              | Chela without very long setae overreaching setae in tufts                    | 0         |                                             |
|                 | Chela with very long setae overreaching setae in tufts                       | 1         | fig. 3J in Vereshchaka <i>et al.</i> (2014) |
| Fourth pereopod |                                                                              |           |                                             |
| 73              | Present in female                                                            | 0         |                                             |
|                 | Absent in female                                                             | 1         |                                             |
| 74              | Fourth pereopod consists of 7 segments in female                             | 0         |                                             |
|                 | Fourth pereopod consists of 6 segments in female                             | 1         |                                             |
|                 | Fourth pereopod consists of 5 segments in female                             | 2         |                                             |
| 75              | Present in male                                                              | 0         |                                             |
|                 | Absent in male                                                               | 1         |                                             |
| 76              | Fourth pereopod consists of 7 segments in male                               | 0         |                                             |
|                 | Fourth pereopod consists of 6 segments in male                               | 1         |                                             |
|                 | Fourth pereopod consists of 3 segments in male                               | 2         |                                             |

Appendix S2. *Continued*

| Character no.       | Character state                                                                     | State no. | Reference to figure and source                |
|---------------------|-------------------------------------------------------------------------------------|-----------|-----------------------------------------------|
| 77                  | Fourth pereopod subcylindrical                                                      | 0         |                                               |
|                     | Fourth pereopod flattened                                                           | 1         |                                               |
| 78                  | Carpus and propodus setose along both margins                                       | 0         |                                               |
|                     | Carpus and propodus setose along one margin only                                    | 1         |                                               |
| Fifth pereopod      |                                                                                     |           |                                               |
| 79                  | Present in female                                                                   | 0         |                                               |
|                     | Absent in female                                                                    | 1         |                                               |
| 80                  | Fourth pereopod consists of 7 segments in female                                    | 0         |                                               |
|                     | Fourth pereopod consists of 6 segments in female                                    | 1         |                                               |
|                     | Fourth pereopod consists of 3 segments in female                                    | 2         |                                               |
| 81                  | Present in male                                                                     | 0         |                                               |
|                     | Absent in male                                                                      | 1         |                                               |
| 82                  | Fourth pereopod consists of 7 segments in male                                      | 0         |                                               |
|                     | Fourth pereopod consists of 6 segments in male                                      | 1         |                                               |
|                     | Fourth pereopod consists of a single segments (coxa) in male                        | 2         |                                               |
| 83                  | Fourth pereopod subcylindrical                                                      | 0         |                                               |
|                     | Fourth pereopod flattened                                                           | 1         |                                               |
| 84                  | Carpus and propodus setose along both margins                                       | 0         |                                               |
|                     | Carpus and propodus setose along one margin only                                    | 1         |                                               |
| Uropodal exopod     |                                                                                     |           |                                               |
| 85                  | Outer spine absent                                                                  | 0         | fig. 10 in Vereshchaka (2009)                 |
|                     | Outer spine present                                                                 | 1         | fig. 10 in Vereshchaka (2009)                 |
| 86                  | Outer spine by far not reaching distal end of exopod                                | 0         |                                               |
|                     | Outer spine nearly reaching distal end of exopod                                    | 1         |                                               |
| 87                  | Outer margin of proximal segment not setose                                         | 0         | fig. 10 in Vereshchaka (2009)                 |
|                     | Outer margin of proximal segment setose                                             | 1         | fig. 10 in Vereshchaka (2009)                 |
| 88                  | Outer margin of proximal segment not setose partly                                  | 0         | fig. 10 in Vereshchaka (2009)                 |
|                     | Outer margin of proximal segment not setose entirely                                | 1         | fig. 10 in Vereshchaka (2009)                 |
| Male clasping organ |                                                                                     |           |                                               |
| 89                  | Absent                                                                              | 0         |                                               |
|                     | Present                                                                             | 1         | fig. 4B–E in Vereshchaka <i>et al.</i> (2014) |
| 90                  | Clasping organ rudimentary                                                          | 0         | fig. 4B in Vereshchaka <i>et al.</i> (2014)   |
|                     | Clasping organ developed                                                            | 1         | fig. 4C–E in Vereshchaka <i>et al.</i> (2014) |
| 91                  | Clasping tubercle absent or rudimentary                                             | 0         |                                               |
|                     | Clasping tubercle present                                                           | 1         |                                               |
| 92                  | A single clasping tubercle present                                                  | 0         |                                               |
|                     | Two clasping tubercles present                                                      | 1         |                                               |
| 93                  | Serrated bristles at the base of the fourth segment absent                          | 0         |                                               |
|                     | Serrated bristles at the base of the fourth segment present                         | 1         |                                               |
| 94                  | Specialized structures on the fourth segment opposite the tubercle absent           | 0         |                                               |
|                     | A set of specialized structures on the fourth segment opposite the tubercle present | 1         |                                               |
| 95*                 | A set of specialized claw-like setae on the fourth segment opposite the tubercle    | 0         |                                               |
|                     | A row of serrated bristles on the fourth segment opposite the tubercle              | 1         |                                               |

Appendix S2. *Continued*

| Character no. | Character state                                                                                                       | State no. | Reference to figure and source                    |
|---------------|-----------------------------------------------------------------------------------------------------------------------|-----------|---------------------------------------------------|
| 96            | Claw-like setae on the fourth segment opposite the tubercle positioned in scattered pairs                             | 0         |                                                   |
|               | Claw-like setae on the fourth segment opposite the tubercle positioned in two contiguous rows with a gap between them | 1         |                                                   |
| 97*           | Scales opposite the tubercle absent                                                                                   | 0         |                                                   |
|               | Scales opposite the tubercle present                                                                                  | 1         |                                                   |
| 98            | A row of morchella-like setae adjacent to the tubercle absent                                                         | 0         |                                                   |
|               | A row of morchella-like setae adjacent to the tubercle present                                                        | 1         |                                                   |
| 99            | Strong distal tooth on the fourth segment absent                                                                      | 0         |                                                   |
|               | Strong distal tooth on the fourth segment present                                                                     | 1         |                                                   |
| Petasma       |                                                                                                                       |           |                                                   |
| 100           | Pars astrigens present                                                                                                | 0         |                                                   |
|               | Pars astrigens absent                                                                                                 | 1         |                                                   |
| 101*          | Pars externa absent                                                                                                   | 0         |                                                   |
|               | Pars astrigens present                                                                                                | 1         |                                                   |
| 102*          | Pars externa vestigial                                                                                                | 0         |                                                   |
|               | Pars externa developed                                                                                                | 1         |                                                   |
| 103*          | Pars externa not transformed into a wide, unsupported sheath                                                          | 0         |                                                   |
|               | Pars externa transformed into a wide, unsupported sheath                                                              | 1         |                                                   |
| 104*          | Pars externa not transformed into a narrow sheath supported by chitinous rib                                          | 0         |                                                   |
|               | Pars externa transformed into a narrow sheath supported by chitinous rib                                              | 1         |                                                   |
| 105           | Processus uncifer without hook                                                                                        | 0         | figs 5C, 6D in Vereshchaka <i>et al.</i> (2014)   |
|               | Processus uncifer with a hook                                                                                         | 1         | fig. 5A, B, D in Vereshchaka <i>et al.</i> (2014) |
| 106*          | Processus uncifer without terminal setae                                                                              | 0         |                                                   |
|               | Processus uncifer with terminal setae                                                                                 | 1         |                                                   |
| 107*          | Processus uncifer unarmed at the tip                                                                                  | 0         |                                                   |
|               | Processus uncifer with fine friction structures at the tip                                                            | 1         |                                                   |
| 108*          | Processus uncifer not armed with transverse ribs along entire margin                                                  | 0         |                                                   |
|               | Processus uncifer armed with transverse ribs along entire margin                                                      | 1         |                                                   |
| 109*          | Processus uncifer without plate-like structures in addition to friction structures                                    | 0         |                                                   |
|               | Processus uncifer with plate-like structures in addition to friction structures                                       | 1         |                                                   |
| 110*          | Capitulum of pars media absent                                                                                        | 0         |                                                   |
|               | Capitulum of pars media present                                                                                       | 1         |                                                   |
| 111*          | Capitulum of pars media developed                                                                                     | 0         |                                                   |
|               | Capitulum of pars media vestigial                                                                                     | 1         |                                                   |
| 112           | Capitulum of pars media armed with pincers                                                                            | 0         |                                                   |
|               | Capitulum of pars media armed with strong claws                                                                       | 1         |                                                   |
| 113           | Capitulum with strong claws entire                                                                                    | 0         |                                                   |
|               | Capitulum with strong claws divided                                                                                   | 1         |                                                   |

Appendix S2. *Continued*

| Character no. | Character state                                                                                      | State no. | Reference to figure and source                    |
|---------------|------------------------------------------------------------------------------------------------------|-----------|---------------------------------------------------|
| 114*          | Capitulum without enlarged claws in addition to ordinary claws                                       | 0         |                                                   |
|               | Capitulum with enlarged claws in addition to ordinary claws                                          | 1         |                                                   |
| 115*          | Capitulum with pincers not divided into lobi or processi                                             | 0         |                                                   |
|               | Capitulum with pincers with at least one lobus or processus                                          | 1         |                                                   |
| 116           | Capitulum with pincers with all lobi and processi present, not divided/significantly modified        | 0         |                                                   |
|               | Capitulum with pincers with at least one lobus or processus absent or divided/significantly modified | 1         |                                                   |
| 117*          | Lobus armatus absent                                                                                 | 0         |                                                   |
|               | Lobus armatus present                                                                                | 1         |                                                   |
| 118           | Lobus armatus rudimentary                                                                            | 0         | fig. 5E in Vereshchaka <i>et al.</i> (2014)       |
|               | Lobus armatus developed                                                                              | 1         | fig. 5A–D in Vereshchaka <i>et al.</i> (2014)     |
| 119           | Lobus connectens and lobus terminalis not twisted                                                    | 0         | fig. 5A–E in Vereshchaka <i>et al.</i> (2014)     |
|               | Lobus connectens and lobus terminalis twisted                                                        | 1         | fig. 6D in Vereshchaka <i>et al.</i> (2014)       |
| 120           | Lobus connectens absent                                                                              | 0         | fig. 5B in Vereshchaka <i>et al.</i> (2014)       |
|               | Lobus connectens present                                                                             | 1         | fig. 4A, C–E in Vereshchaka <i>et al.</i> (2014)  |
| 121           | Lobus connectens rudimentary                                                                         | 0         | fig. 5C in Vereshchaka <i>et al.</i> (2014)       |
|               | Lobus connectens developed                                                                           | 1         | fig. 5A, D, E in Vereshchaka <i>et al.</i> (2014) |
| 122           | Lobus connectens entire                                                                              | 0         | fig. 5A, C, D in Vereshchaka <i>et al.</i> (2014) |
|               | Lobus connectens divided                                                                             | 1         | fig. 5E in Vereshchaka <i>et al.</i> (2014)       |
|               | Lobus connectens with additional lobe at base directed upward                                        | 2         | fig. 6C in Vereshchaka <i>et al.</i> (2014)       |
|               | Lobus connectens with additional lobe at base directed downward                                      | 3         |                                                   |
| 123           | Lobus connectens not swan-shaped                                                                     | 0         | fig. 6B, C in Vereshchaka <i>et al.</i> (2014)    |
|               | Lobus connectens swan-shaped                                                                         | 1         | fig. 6E in Vereshchaka <i>et al.</i> (2014)       |
| 124           | Lobus connectens without pillow at base                                                              | 0         | fig. 6C, D in Vereshchaka <i>et al.</i> (2014)    |
|               | Lobus connectens with pillow at base                                                                 | 1         | fig. 6E in Vereshchaka <i>et al.</i> (2014)       |
| 125           | Apex of lobus connectens unarmed or with a few ordinary suckers                                      | 0         | fig. 5D, E in Vereshchaka <i>et al.</i> (2014)    |
|               | Apex of lobus connectens bearing a single, much enlarged sucker with a hook inside                   | 1         | fig. 6E in Vereshchaka <i>et al.</i> (2014)       |
| 126           | Lobus inermis straight                                                                               | 0         | fig. 5A, B, E in Vereshchaka <i>et al.</i> (2014) |
|               | Lobus inermis curved                                                                                 | 1         | fig. 6A in Vereshchaka <i>et al.</i> (2014)       |
| 127           | Lobus inermis narrow                                                                                 | 0         | fig. 5B in Vereshchaka <i>et al.</i> (2014)       |
|               | Lobus inermis inflated                                                                               | 1         | fig. 6A in Vereshchaka <i>et al.</i> (2014)       |
| 128           | Lobus terminalis absent or rudimentary                                                               | 0         |                                                   |
|               | Lobus terminalis developed                                                                           | 1         | fig. 5A–D in Vereshchaka <i>et al.</i> (2014)     |
| 129           | Lobus terminalis entire                                                                              | 0         | fig. 5A–D in Vereshchaka <i>et al.</i> (2014)     |
|               | Lobus terminalis apically divided                                                                    | 1         | fig. 6A in Vereshchaka <i>et al.</i> (2014)       |
|               | Lobus terminalis with additional lobe at base                                                        | 2         | figs 1C, 3C in Vereshchaka <i>et al.</i> (2014)   |
| 130           | Processus ventralis absent                                                                           | 0         | fig. 5C in Vereshchaka <i>et al.</i> (2014)       |
|               | Processus ventralis present                                                                          | 1         | fig. 5A, B, D in Vereshchaka <i>et al.</i> (2014) |
| 131           | Processus ventralis rudimentary                                                                      | 0         | fig. 5E in Vereshchaka <i>et al.</i> (2014)       |
|               | Processus ventralis developed                                                                        | 1         | fig. 5A, B, D in Vereshchaka <i>et al.</i> (2014) |
| 132*          | Processus ventralis without lateral friction structures                                              | 0         |                                                   |
|               | Processus ventralis with lateral friction structures                                                 | 1         |                                                   |

Appendix S2. Continued

| Character no. | Character state                                                                                    | State no. | Reference to figure and source                        |
|---------------|----------------------------------------------------------------------------------------------------|-----------|-------------------------------------------------------|
| 133*          | Processus ventralis without minute apical setae                                                    | 0         |                                                       |
|               | Processus ventralis with minute apical setae                                                       | 1         |                                                       |
| 134           | Processus ventralis entire                                                                         | 0         | fig. 5A, B, D in Vereshchaka <i>et al.</i> (2014)     |
|               | Processus ventralis divided                                                                        | 1         | Figs 2C, 4C in present paper                          |
| 135           | Processus ventralis divided once                                                                   | 0         |                                                       |
|               | Processus ventralis divided more than once                                                         | 1         |                                                       |
| 136           | Processus ventralis elongate                                                                       | 0         | fig. 5A, B, D in Vereshchaka <i>et al.</i> (2014)     |
|               | Processus ventralis triangular                                                                     | 1         | fig. 5E in Vereshchaka <i>et al.</i> (2014)           |
|               | Processus ventralis needle-like                                                                    | 2         |                                                       |
| 137           | Processus ventralis without hooks and suckers                                                      | 0         | fig. 5A–E in Vereshchaka <i>et al.</i> (2014)         |
|               | Processus ventralis with hooks and suckers                                                         | 1         | fig. 6B in Vereshchaka <i>et al.</i> (2014)           |
| 138           | Processus ventralis without simple spines                                                          | 0         | fig. 5A, C, E in Vereshchaka <i>et al.</i> (2014)     |
|               | Processus ventralis with simple spines                                                             | 1         | fig. 5B, D in Vereshchaka <i>et al.</i> (2014)        |
| 139           | Processus ventralis without stellate spines                                                        | 0         | fig. 5A, D, E in Vereshchaka <i>et al.</i> (2014)     |
|               | Processus ventralis with stellate spines                                                           | 1         | fig. 5B in Vereshchaka <i>et al.</i> (2014)           |
| 140*          | Processus ventralis, a single simple spine                                                         | 0         |                                                       |
|               | Processus ventralis, 5 or more simple spines                                                       | 1         |                                                       |
|               | Processus ventralis, 2–4 simple spines                                                             | 2         |                                                       |
| 141           | Processus ventralis without apical lashes                                                          | 0         | fig. 5B–E in Vereshchaka <i>et al.</i> (2014)         |
|               | Processus ventralis with apical lashes                                                             | 1         | fig. 5A in Vereshchaka <i>et al.</i> (2014)           |
| 142           | Processus ventralis with 2 apical lashes positioned as a pincer                                    | 0         | fig. 5B–E in Vereshchaka <i>et al.</i> (2014)         |
|               | Processus ventralis with 5–25 apical lashes in row                                                 | 1         | fig. 5A in Vereshchaka <i>et al.</i> (2014)           |
| Photophores   |                                                                                                    |           |                                                       |
| 143           | The organ of Pesta absent                                                                          | 0         | fig. 2F in Vereshchaka <i>et al.</i> (2014)           |
|               | The organ of Pesta present                                                                         | 1         | fig. 2E in Vereshchaka <i>et al.</i> (2014)           |
| 144           | The organ of Pesta: anterolateral organs lobed and posterolateral organs fringed                   | 0         | fig. 12, upper row, in Vereshchaka (2009)             |
|               | The organ of Pesta: both anterolateral and posterolateral organs spheroid                          | 1         | fig. 12, middle and lower rows, in Vereshchaka (2009) |
| 145           | The organ of Pesta: 3 distinct organs (2 lateral midgastric and 1 continuous posterior fringe)     | 0         | fig. 12 in Vereshchaka (2009)                         |
|               | The organ of Pesta: 6–anteromedian, 2 lateral midgastric, 3–5 posterolateral fringes)              | 1         | fig. 12 in Vereshchaka (2009)                         |
|               | The organ of Pesta: 1 distinct posteromedian organ                                                 | 2         | fig. 12 in Vereshchaka (2009)                         |
|               | The organ of Pesta: 2–3 distinct organs (2 posterolateral and, in some species, 1 posteromedian)   | 3         | fig. 12 in Vereshchaka (2009)                         |
|               | The organ of Pesta: 3 distinct organs (1 anteromedian and 2 posterolateral)                        | 4         | fig. 12 in Vereshchaka (2009)                         |
|               | The organ of Pesta: 4 distinct organs (1 anteromedian, 2 posterolateral, and 1 posteromedian)      | 5         | fig. 12 in Vereshchaka (2009)                         |
|               | The organ of Pesta: 5 distinct organs (1 anteromedian, 2 lateral midgastric, and 2 posterolateral) | 6         | fig. 12 in Vereshchaka (2009)                         |
| 146           | Dermal photophores absent                                                                          | 0         |                                                       |
|               | Dermal photophores present                                                                         | 1         |                                                       |
| 147           | Dermal photophores without lens                                                                    | 0         | fig. 7C–F in Vereshchaka <i>et al.</i> (2014)         |
|               | Dermal photophores with lens                                                                       | 1         | fig. 7A, B in Vereshchaka <i>et al.</i> (2014)        |

Appendix S2. *Continued*

| Character no. | Character state                                                                                                  | State no. | Reference to figure and source                 |
|---------------|------------------------------------------------------------------------------------------------------------------|-----------|------------------------------------------------|
| 148           | A total of 130–170 dermal photophores                                                                            | 0         |                                                |
|               | A total of 190–210 dermal photophores                                                                            | 1         |                                                |
|               | A total of 225 or more dermal photophores                                                                        | 2         |                                                |
| 149           | Dermal photophores arranged in a single lateral row on carapace                                                  | 0         | fig. 7B in Vereshchaka <i>et al.</i> (2014)    |
|               | Dermal photophores arranged in 2 lateral rows on carapace                                                        | 1         | fig. 7A in Vereshchaka <i>et al.</i> (2014)    |
| 150           | Number of dermal photophores in the upper row on carapace fixed                                                  | 0         |                                                |
|               | Number of dermal photophores in the upper row on carapace not fixed                                              | 1         |                                                |
| 151           | Three or fewer dermal photophores in the upper row on carapace                                                   | 0         |                                                |
|               | Four or more dermal photophores in the upper row on carapace                                                     | 1         | fig. 7A, B in Vereshchaka <i>et al.</i> (2014) |
| 152           | Number of dermal photophores on scaphocerite not fixed                                                           | 0         |                                                |
|               | Number of dermal photophores on scaphocerite fixed                                                               | 1         |                                                |
| 153           | A total of 8 or more dermal photophores on scaphocerite                                                          | 0         | fig. 7C, E in Vereshchaka <i>et al.</i> (2014) |
|               | A total of 7 dermal photophores on scaphocerite                                                                  | 1         |                                                |
|               | A total of 4–6 dermal photophores on scaphocerite                                                                | 2         | fig. 7G in Vereshchaka <i>et al.</i> (2014)    |
|               | A total of 2–3 dermal photophores on scaphocerite                                                                | 3         |                                                |
| 154           | Dermal photophores on scaphocerite large                                                                         | 0         | fig. 7C in Vereshchaka <i>et al.</i> (2014)    |
|               | Dermal photophores on scaphocerite small                                                                         | 1         | fig. 7E in Vereshchaka <i>et al.</i> (2014)    |
| 155           | Dermal photophores on scaphocerite partly fused                                                                  | 0         | fig. 7C in Vereshchaka <i>et al.</i> (2014)    |
|               | Dermal photophores on scaphocerite separated from each other                                                     | 1         | fig. 7E in Vereshchaka <i>et al.</i> (2014)    |
| 156           | Dermal photophores arranged on scaphocerite in a single longitudinal row                                         | 0         | fig. 7E, G in Vereshchaka <i>et al.</i> (2014) |
|               | Dermal photophores arranged on scaphocerite in 2 rows, longitudinal and oblique                                  | 1         | fig. 7C in Vereshchaka <i>et al.</i> (2014)    |
| 157           | Dermal lens-less photophores on uropodal exopod positioned with gaps, at least between distal and basal segments | 0         | fig. 7D, H in Vereshchaka <i>et al.</i> (2014) |
|               | Dermal lens-less photophores on uropodal exopod positioned in contiguous row, equally spaced from each other     | 1         | fig. 7F in Vereshchaka <i>et al.</i> (2014)    |
| 158           | Dermal photophores on uropodal exopod large                                                                      | 0         | fig. 7D in Vereshchaka <i>et al.</i> (2014)    |
|               | Dermal photophores on uropodal exopod small                                                                      | 1         | fig. 7F, H in Vereshchaka <i>et al.</i> (2014) |
| 159           | Dermal photophores on uropodal exopod separated from each other                                                  | 0         | fig. 7F in Vereshchaka <i>et al.</i> (2014)    |
|               | Dermal photophores on uropodal exopod partly fused                                                               | 1         | fig. 7D in Vereshchaka <i>et al.</i> (2014)    |
| 160           | Dermal photophores on basal segment of uropodal exopod positioned closer to central axis                         | 0         | fig. 7D, H in Vereshchaka <i>et al.</i> (2014) |
|               | Dermal photophores on basal segment of uropodal exopod positioned closer to margin                               | 1         | fig. 7F in Vereshchaka <i>et al.</i> (2014)    |
| 161           | Number of dermal photophores on basal segment of uropodal exopod not fixed                                       | 0         |                                                |
|               | Number of dermal photophores on basal segment of uropodal exopod fixed                                           | 1         |                                                |

Appendix S2. *Continued*

| Character no. | Character state                                                                           | State no. | Reference to figure and source                 |
|---------------|-------------------------------------------------------------------------------------------|-----------|------------------------------------------------|
| 162           | A total of 3 or more dermal photophores on basal segment of uropodal exopod               | 0         | fig. 7F in Vereshchaka <i>et al.</i> (2014)    |
|               | Two dermal photophores on basal segment of uropodal exopod                                | 1         |                                                |
|               | A single dermal photophore on basal segment of uropodal exopod                            | 2         | fig. 7H in Vereshchaka <i>et al.</i> (2014)    |
| 163           | Dermal photophores on distal segment of uropodal exopod positioned closer to central axis | 0         | fig. 7D, H in Vereshchaka <i>et al.</i> (2014) |
|               | Dermal photophores on distal segment of uropodal exopod positioned closer to margin       | 1         | fig. 7F in Vereshchaka <i>et al.</i> (2014)    |
| 164           | Dermal photophores on distal segment of uropodal exopod arranged in a single row          | 0         | fig. 7F, H in Vereshchaka <i>et al.</i> (2014) |
|               | Dermal photophores on distal segment of uropodal exopod arranged in 2 rows/triangle       | 1         | fig. 7D in Vereshchaka <i>et al.</i> (2014)    |
| 165           | Number of dermal photophores on distal segment of uropodal exopod not fixed               | 0         |                                                |
|               | Number of dermal photophores on distal segment of uropodal exopod fixed                   | 1         |                                                |
| 166           | No dermal photophores on distal segment of uropodal exopod                                | 0         |                                                |
|               | A single dermal photophore on distal segment of uropodal exopod                           | 1         | fig. 7H in Vereshchaka <i>et al.</i> (2014)    |
|               | A total of 3 or more dermal photophores on distal segment of uropodal exopod              | 2         | fig. 7F in Vereshchaka <i>et al.</i> (2014)    |
| Larva         |                                                                                           |           |                                                |
| 167           | Metamorphosis of usual dendrobranchiate type                                              | 0         |                                                |
|               | Metamorphosis elaborated, including elaphocaris and acanthosoma stages                    | 1         |                                                |
| 168           | Elaphocaris stage of <i>dohrni</i> type                                                   | 0         | fig. 2 in Vereshchaka (2009)                   |
|               | Elaphocaris stage of <i>hispida</i> type                                                  | 1         | fig. 2 in Vereshchaka (2009)                   |
|               | Elaphocaris stage of <i>ortmanni</i> type                                                 | 2         | fig. 2 in Vereshchaka (2009)                   |



Appendix S3. Continued

|                                |                                           |
|--------------------------------|-------------------------------------------|
| Acetes indicus                 | -01000300200010-00100021011002101-1-1-1-0 |
| Peisos petrunkevitchi          | -01000300200010-001000210000021002021-020 |
| Sicyonella maldivensis         | -0100020000201100000001100000110000011000 |
| Petalidium obesum              | -010001000000-----02--00-02--010111010    |
| Sergia tenuiremis              | -01100000000010-01-0002101000210010110010 |
| Gardinerosergia gardneri       | -01120000000010-01-0002101000210010110010 |
| Phorcosergia phorca            | -01100000000010-01-0002101000210010110010 |
| Robustosergia robusta          | -01100000000010-01-0002101000210010110010 |
| Prehensilosergia prehensilis   | -01110000000010-01-0002101000210010110010 |
| Scintillosergia scintillans    | -01110000000010-01-0002101000210010110010 |
| Challengerosergia challengerii | 001110000000010-01-0002101000210010110010 |
| Lucenosergia lucens            | -01110000000010-01-0002101000210010110010 |
| Deosergestes corniculum        | -01110000000011201-0002111010201010110010 |
| Eusergestes arcticus           | -01110000000011201-0002101000210010111010 |
| Sergestes atlanticus           | -01020000000011401-0002100000210010111010 |
| Cornutosergestes cornutus      | -01020000100011401-0002100000210010111010 |
| Allosergestes sargassi         | -00-10000001011101-0002001010201010110010 |
| Parasergestes armatus          | -00-20000001011011-1002101000210010111010 |
| Neosergestes edwardsi          | -01120000001011201-1102100000210010111010 |

Characters 82 - 122

|                                | 82                                        | 87 | 92 | 97 | 102 | 107 | 112 | 117 | 122 |
|--------------------------------|-------------------------------------------|----|----|----|-----|-----|-----|-----|-----|
| Aristaeomorpha foliacea        | 00-100-0-----00-----0-----                |    |    |    |     |     |     |     |     |
| Gennadas parvus                | 00-100-0-----011000000010-----            |    |    |    |     |     |     |     |     |
| Penaeus monodon                | 00-100-0-----00-----0-----                |    |    |    |     |     |     |     |     |
| Lucifer typus                  | ---110-0-----111101001011---11-----       |    |    |    |     |     |     |     |     |
| Lucifer orientalis             | ---110-0-----111100001011---11-----       |    |    |    |     |     |     |     |     |
| Lucifer intermedius            | ---110-0-----111010110111---11-----       |    |    |    |     |     |     |     |     |
| Lucifer penicillifer           | ---110-0-----111010110111---11-----       |    |    |    |     |     |     |     |     |
| Lucifer faxoni                 | ---110-0-----111010110111---11-----       |    |    |    |     |     |     |     |     |
| Lucifer chacei                 | ---110-0-----111010110111---11-----       |    |    |    |     |     |     |     |     |
| Lucifer hanseni                | ---100-0-----111010110111---11-----       |    |    |    |     |     |     |     |     |
| Acetes indicus                 | 21-100-1110110000000---000011100-----     |    |    |    |     |     |     |     |     |
| Peisos petrunkevitchi          | 21-100-110-111-001011001000011110-----    |    |    |    |     |     |     |     |     |
| Sicyonella maldivensis         | 011100-110-01010000110000000110--11110110 |    |    |    |     |     |     |     |     |
| Petalidium obesum              | 111100-110-011-0100110010000110--11110100 |    |    |    |     |     |     |     |     |
| Sergia tenuiremis              | 110100-111000--0000110010000110--10110110 |    |    |    |     |     |     |     |     |
| Gardinerosergia gardneri       | 110100-111010-00000110010000110--11110112 |    |    |    |     |     |     |     |     |
| Phorcosergia phorca            | 110100-111010--0000110010000110--11110113 |    |    |    |     |     |     |     |     |
| Robustosergia robusta          | 110100-111010--0000110010000110--11111110 |    |    |    |     |     |     |     |     |
| Prehensilosergia prehensilis   | 110100-111010--0000110010000110--11110111 |    |    |    |     |     |     |     |     |
| Scintillosergia scintillans    | 110100-111010--0000110010000110--11110110 |    |    |    |     |     |     |     |     |
| Challengerosergia challengerii | 110100-1110011-0000110010000110--11100110 |    |    |    |     |     |     |     |     |
| Lucenosergia lucens            | 110100-111010-00000110010000110--11100100 |    |    |    |     |     |     |     |     |
| Deosergestes corniculum        | 1100-10111000--0000110010000110--11110110 |    |    |    |     |     |     |     |     |
| Eusergestes arcticus           | 111100-111000--0000110010000110--11110110 |    |    |    |     |     |     |     |     |

Appendix S3. Continued

|                                  |                                           |
|----------------------------------|-------------------------------------------|
| <i>Sergestes atlanticus</i>      | 111100-111000--0000110000000110--11100111 |
| <i>Cornutosergestes cornutus</i> | 111100-111000--0000110000000110--11110100 |
| <i>Allosergestes sargassi</i>    | 1100-10111000--0000110010000110--111100-- |
| <i>Parasergestes armatus</i>     | 1110-10111000--0000110000000110--11110100 |
| <i>Neosergestes edwardsi</i>     | 1110-11111000--0000110000000110--11110111 |

Characters 123 - 168

|                                       | 123          | 128       | 133          | 138    | 143    | 148   | 153   | 158   | 163                     |
|---------------------------------------|--------------|-----------|--------------|--------|--------|-------|-------|-------|-------------------------|
| <i>Aristaeomorpha foliacea</i>        | -----        | 0         | -            | 0      | -----  | 0     | ----- | 0     | -----                   |
| <i>Gennadas parvus</i>                | -----        | 0         | -            | 0      | -----  | 0     | ----- | 0     | -----                   |
| <i>Penaeus monodon</i>                | -----        | 0         | -            | 0      | -----  | 0     | ----- | 0     | -----                   |
| <i>Lucifer typus</i>                  | -----        | 11000     | -            | 0000   | -      | 100   | -     | 0     | -----                   |
| <i>Lucifer orientalis</i>             | -----        | 11000     | -            | 0000   | -      | 100   | -     | 0     | -----                   |
| <i>Lucifer intermedius</i>            | -----        | 11        | -            | 00     | -      | 2000  | -     | 0     | -----                   |
| <i>Lucifer penicillifer</i>           | -----        | 11110     | -            | 2000   | -      | 0     | -     | 0     | -----                   |
| <i>Lucifer faxoni</i>                 | -----        | 11100     | -            | 2000   | -      | 0     | -     | 0     | -----                   |
| <i>Lucifer chacei</i>                 | -----        | 11100     | -            | 2000   | -      | 0     | -     | 0     | -----                   |
| <i>Lucifer hanseni</i>                | -----        | 11100     | -            | 2000   | -      | 0     | -     | 0     | -----                   |
| <i>Acetes indicus</i>                 | -----        | 11000     | -            | 2000   | -      | 0     | -     | 0     | -----                   |
| <i>Peisos petrunkevitchi</i>          | -----        | 0         | -----        | 0      | -      | 0     | ----- | 0     | -----                   |
| <i>Sicyonella maldivensis</i>         | 000          | -         | 121100110100 | -      | 0      | -     | 0     | ----- | 0                       |
| <i>Petalidium obesum</i>              | 000          | -         | 121100100100 | -      | 0      | -     | 0     | ----- | 0                       |
| <i>Sergia tenuiremis</i>              | 000001011000 | -         | 0000         | -      | 0      | -     | 0     | ----- | 11                      |
| <i>Gardinerosergia gardneri</i>       | 000          | -         | 1011000      | -      | 0000   | -     | 0     | -     | 10211100110110100100211 |
| <i>Phorcosergia phorca</i>            | 110001011000 | -         | 0000         | -      | 0      | -     | 0     | -     | 10211100001001000010211 |
| <i>Robustosergia robusta</i>          | 111001011000 | -         | 0000         | -      | 0      | -     | 0     | -     | 10211100110010000000211 |
| <i>Prehensilosergia prehensilis</i>   | 000001011000 | -         | 0000         | -      | 0      | -     | 0     | -     | 11211100110010000000211 |
| <i>Scintillosergia scintillans</i>    | 000010       | -         | 0            | -      | 00     | -     | 0     | -     | 11210111110010011001111 |
| <i>Challengerosergia challengerii</i> | 000111111000 | -         | 0000         | -      | 0      | -     | 0     | -     | 11100112110010012001111 |
| <i>Lucenosergia lucens</i>            | 000          | -         | 1011000      | -      | 0100   | -     | 0     | -     | 11000013110010012001111 |
| <i>Deosergestes corniculum</i>        | 000001011000 | -         | 0000         | -      | 111010 | ----- | ----- | ----- | 12                      |
| <i>Eusergestes arcticus</i>           | 000          | -         | 1011000      | -      | 0010   | -     | 0     | -     | 1000                    |
| <i>Sergestes atlanticus</i>           | 000001010000 | -         | 1000         | -      | 0      | -     | 1150  | ----- | 10                      |
| <i>Cornutosergestes cornutus</i>      | 000          | -         | 100          | -      | 00     | -     | 0     | -     | 1120                    |
| <i>Allosergestes sargassi</i>         | --           | 001011000 | -            | 001110 | -      | 1130  | ----- | ----- | 10                      |
| <i>Parasergestes armatus</i>          | 000011010000 | -         | 0000         | -      | 0      | -     | 1140  | ----- | 10                      |
| <i>Neosergestes edwardsi</i>          | 000011210000 | -         | 0000         | -      | 0      | -     | 1160  | ----- | 10                      |
